# Supplementary material for: A novel two-photon fluorescent probe with a long Stokes shift and a high signal-to-background ratio for human NAD(P)H:quinone oxidoreductase 1 (hNQO1) detection and imaging in living cells and tissues
Source: Royal Society of Chemistry journal article supplement (doi:10.1039/c7an00575j), 2017-01-01
Supplement: c7an00575j1.pdf [file c7an00575j1.pdf]

## Electronic Supplementary Information (ESI)

# **A Novel Two-photon fluorescent probe with Long Stokes Shift and High Signal-to-Background Ratio for human NAD(P)H:Quinone Oxidoreductase-1 (hNQO1) detection and imaging in living cells and tissues**

Dan Pan<sup>§</sup>, Fengyan Luo<sup>§</sup>, Xianjun Liu\*, Wei Liu, Wen Chen, Feng Liu, Yong-Qing Kuang, and Jian-Hui Jiang\*

State Key Laboratory of Chemo/Bio-Sensing and Chemometrics, College of Chemistry and Chemical Engineering, Hunan University, Changsha 410082, China

\* Corresponding author. E-mail: [jianhuijiang@hnu.edu.cn](mailto:jianhuijiang@hnu.edu.cn); [liuxianjunsad@163.com](mailto:liuxianjunsad@163.com)

Tel.: 86-731-88821916; Fax: 86-731-88821916

<sup>§</sup>These authors contributed equally

### Calculation equation of TP absorption cross sections( $\delta$ )

The two-photon absorption cross sections of samples ( $\delta_s$ ) was calculated as the following equation:<sup>1</sup>

$$\delta_S = \frac{S_S}{S_R} \cdot \left[ \frac{\Phi_S \cdot C_R \cdot n_S}{\Phi_R \cdot C_S \cdot n_R} \right] \cdot \delta_S$$

Subscript S and R denote the sample and the reference, respectively. S represents the intensity of TPE fluorescence emission,  $\Phi$  is the fluorescence quantum yield, C denotes the concentration, and n represents the refractive index of the solvents.

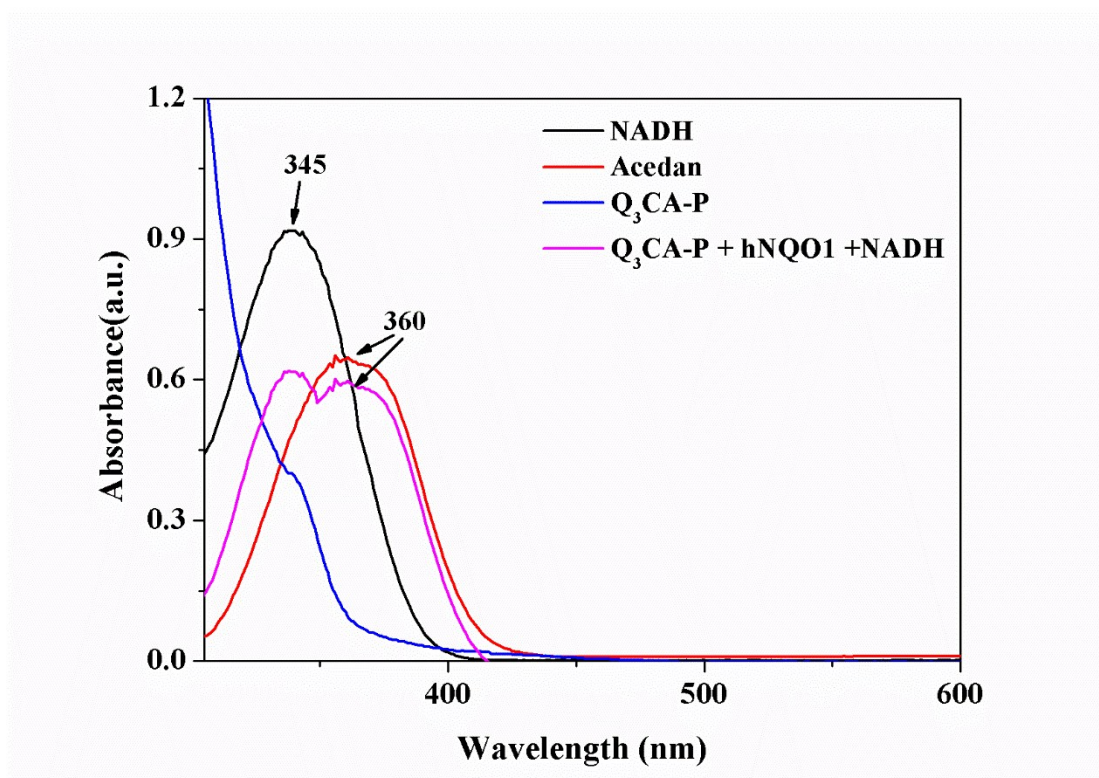

**Figure S1.** UV-vis absorption spectra of NADH (400  $\mu$ M, black line), Acedan (50  $\mu$ M, red line), Q<sub>3</sub>CA-P (50  $\mu$ M) before (blue line) and after (magenta line) reacted with hNQO1 (500 ng/mL) in the presence of NADH (250  $\mu$ M) at 37 °C for 30 min.

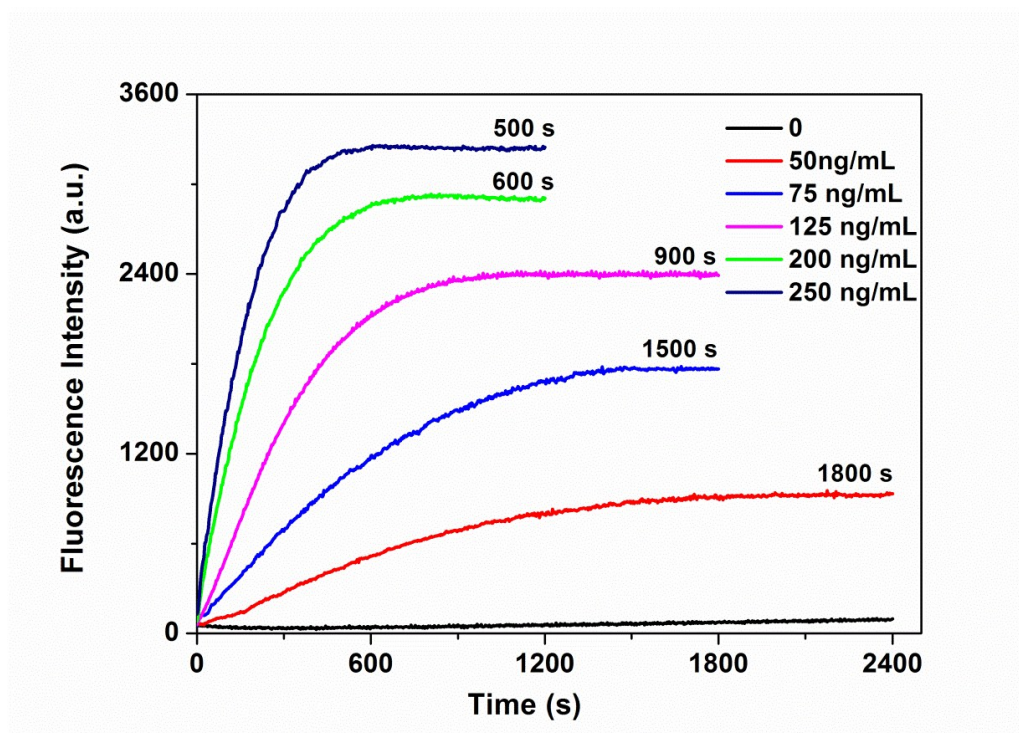

**Figure S2.** Time dependent fluorescence emission intensity ( $\lambda_{ex/em} = 360/502$  nm) of  $Q_3CA-P$  ( $5 \mu M$ ) reacted with different hNQO1 concentration of 250 ng/mL (navy line), 200 ng/mL (green line), 125 ng/mL (magenta line), 75 ng/mL (blue line), 50 ng/mL (red line), and without hNQO1 (black line).

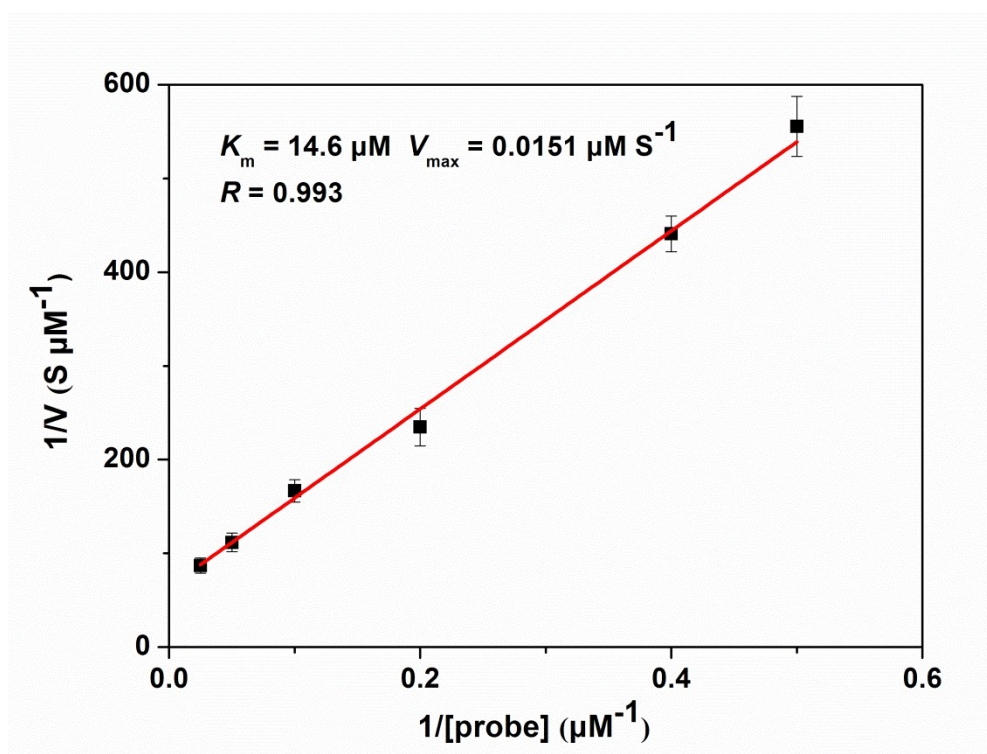

**Figure S3.** Lineweaver-Burk plot for the enzyme-catalyzed reaction. The Michaelis-Menten equation was described as:  $V = V_{max} [probe] / (K_m + [probe])$ , where  $V$  is the reaction rate,  $[probe]$  is the  $Q_3CA-P$  concentration (substrate), and  $K_m$  is the Michaelis constant. Conditions: 125 ng/mL hNQO1, 50  $\mu M$  NADH, 2-40  $\mu M$  of  $Q_3CA-P$ ,  $\lambda_{ex/em} = 360/502$  nm.

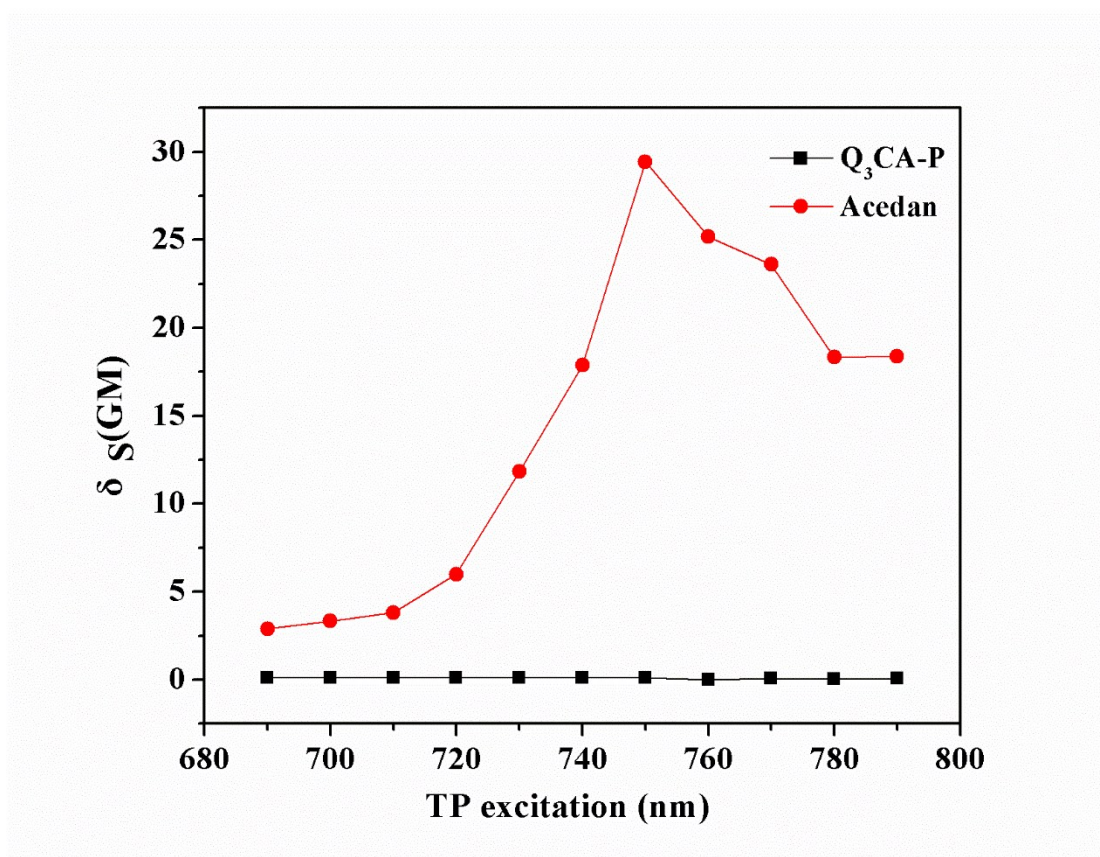

**Figure S4.** Two-photon action spectra of Q<sub>3</sub>CA-P and Acedan in PBS buffer (10 mM, pH 7.4). The estimated uncertainties for the two-photon action cross section values ( $\delta_s$ ) are  $\pm 15\%$ .

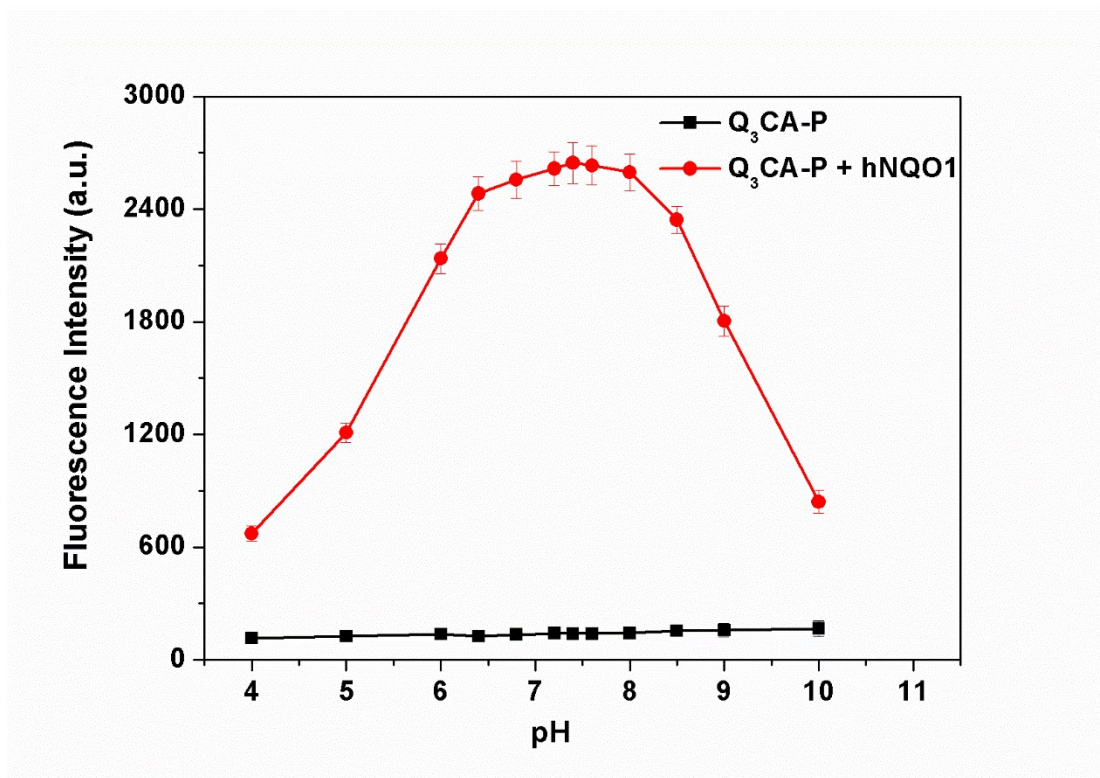

**Figure S5.** Effect of pH value on the fluorescence intensity of Q<sub>3</sub>CA-P (5  $\mu$ M) reacted with hNQO1 (125 ng/mL) in the presence of NADH (50  $\mu$ M) at 37 °C.  $\lambda_{ex/em} = 360/502$  nm.

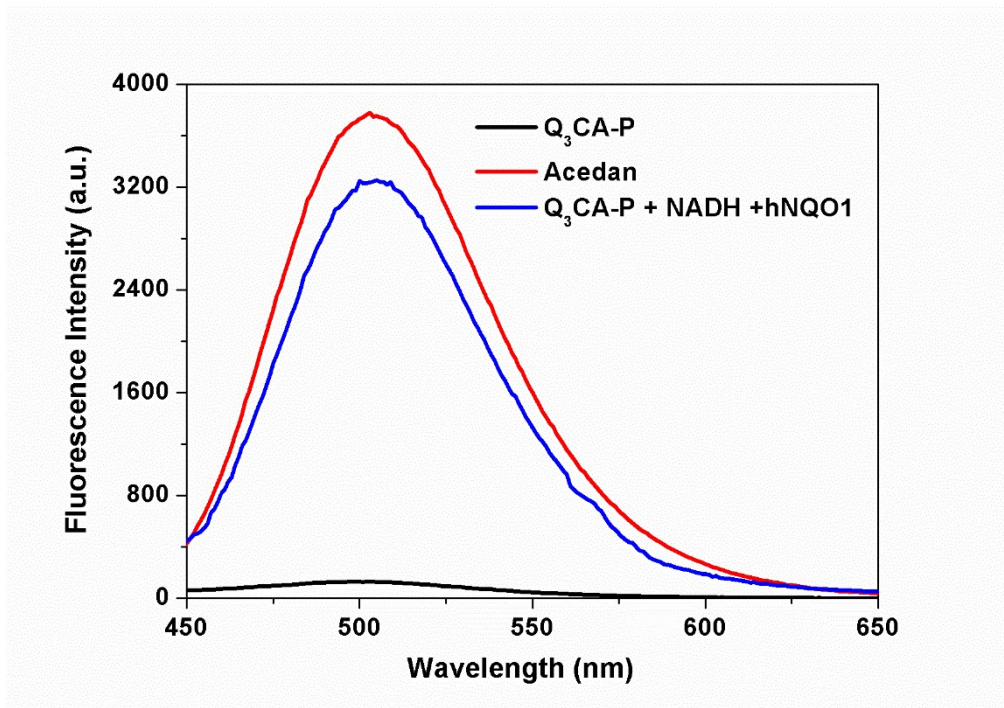

**Figure S6.** Fluorescence intensity spectra of Acedan (5  $\mu$ M, red line), Q<sub>3</sub>CA-P (5  $\mu$ M) before (black line) and after (blue line) reacted with hNQO1 (250 ng/mL) in the presence of NADH (50  $\mu$ M) at 37  $^{\circ}$ C for 30 min.  $\lambda_{ex/em}$  = 360/502 nm.

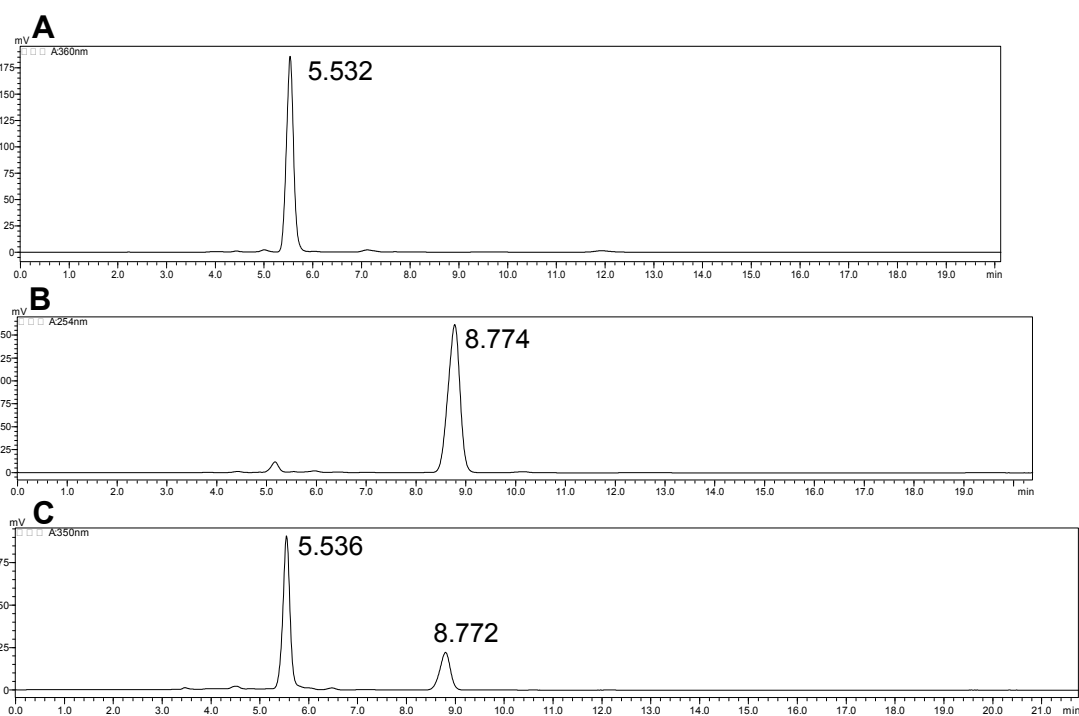

**Figure S7.** HPLC profiles of (A) 50  $\mu$ M Acedan, (B) 50  $\mu$ M Q<sub>3</sub>CA-P, (C) 25  $\mu$ M Q<sub>3</sub>CA-P mixed with 625 ng/mL hNQO1 in the presence of 250  $\mu$ M NADH for 30 min.

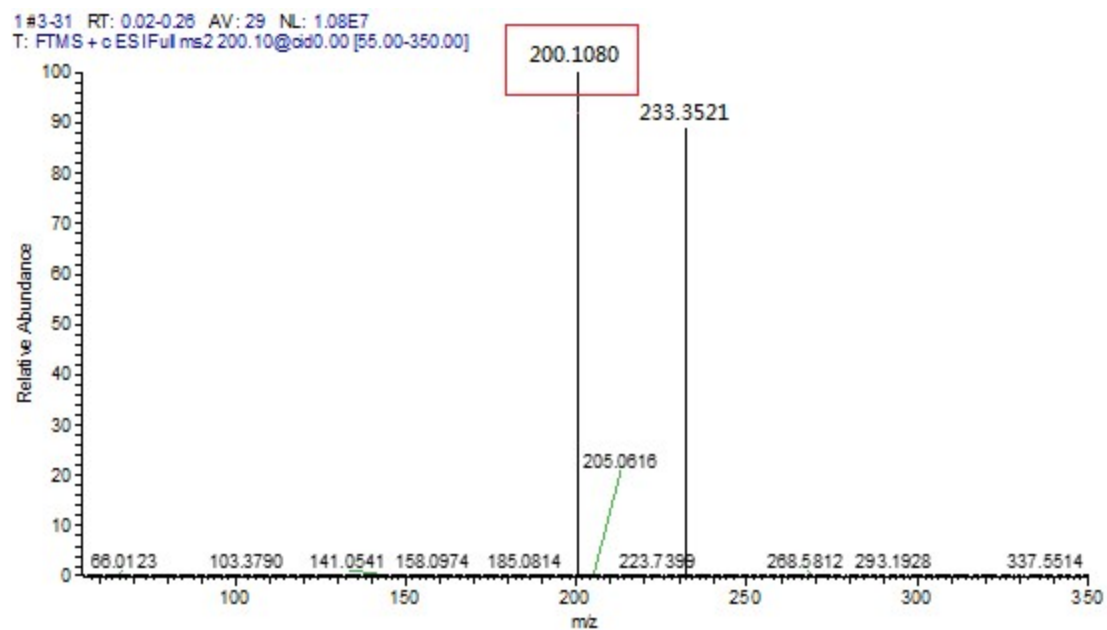

Figure S8. ESI-MS spectrum of reaction product

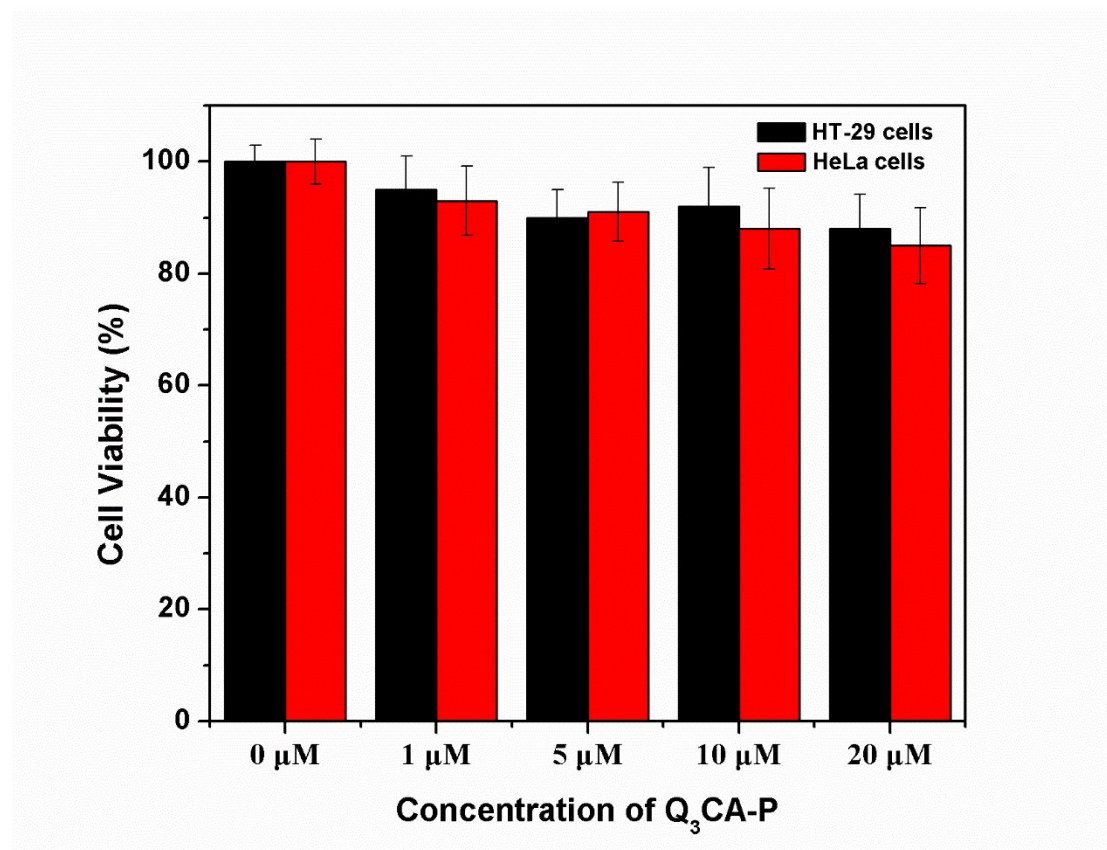

Figure S9. Effects of Q<sub>3</sub>CA-P with varied concentrations (1-30 μM) on the viability of HT-29 cells and HeLa cells. The viability of cells without Q<sub>3</sub>CA-P is defined as 100%, The results are the means ± SD of three experiments.

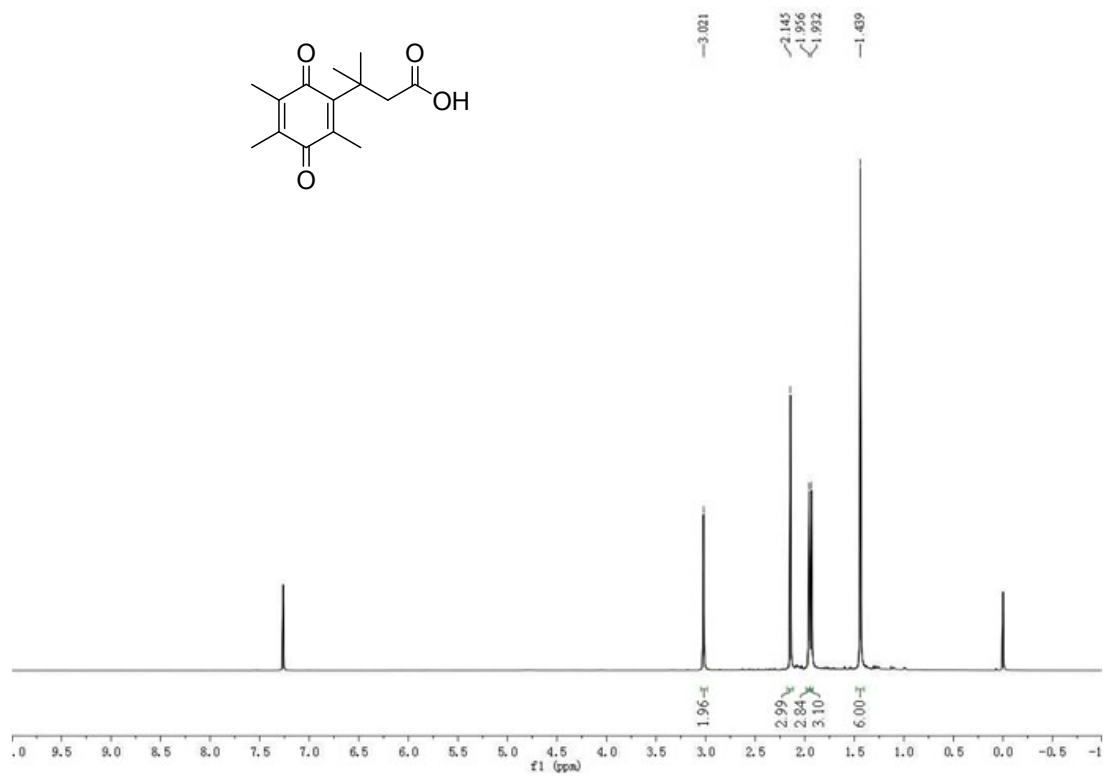

Figure S10. <sup>1</sup>H NMR spectrum of compound 2 in CDCl<sub>3</sub>

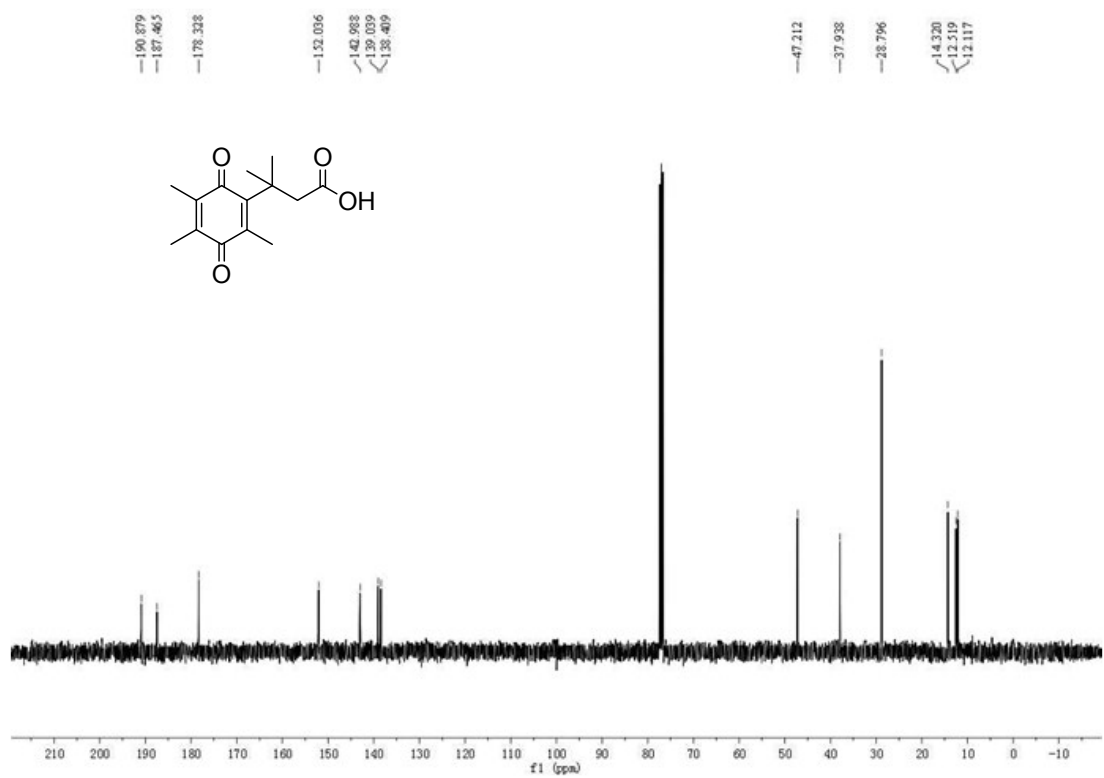

Figure S11. <sup>13</sup>C NMR spectrum of compound 2 in CDCl<sub>3</sub>

lj-150914-250 #19 RT: 0.36 AM: 1 SB: 3 0.15-0.18 NL: 5.02E5  
T: -c ESIms [50.00-1000.00]

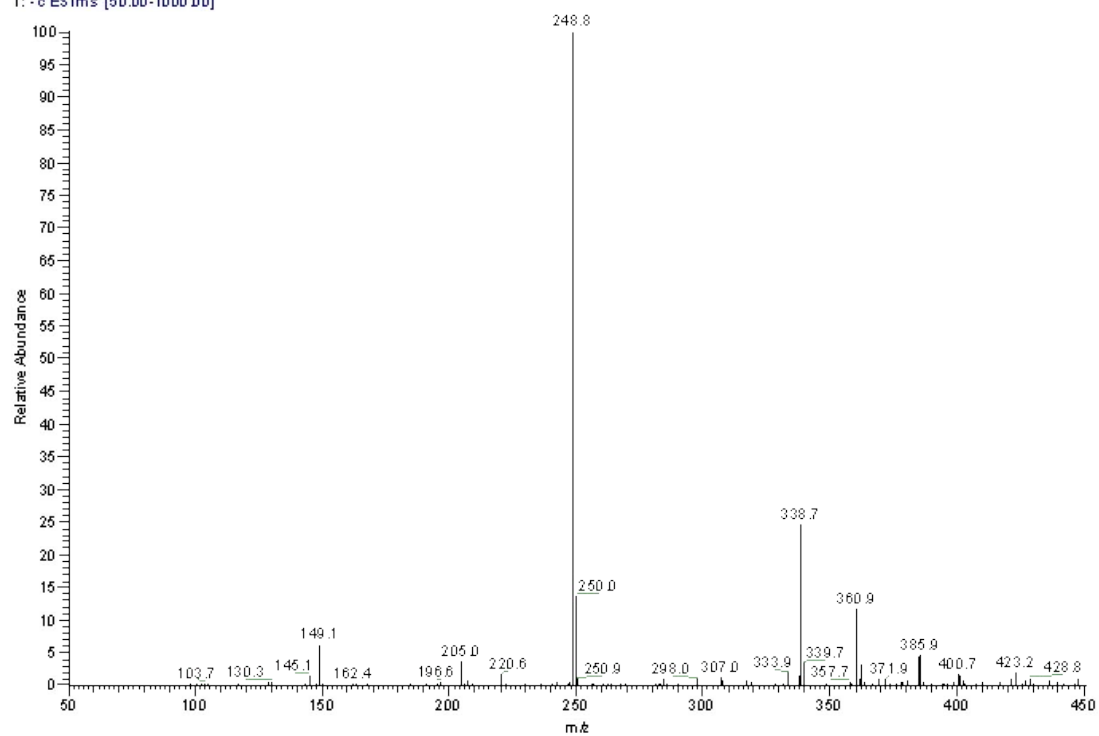

Figure S12. ESI-MS spectrum of compound 2

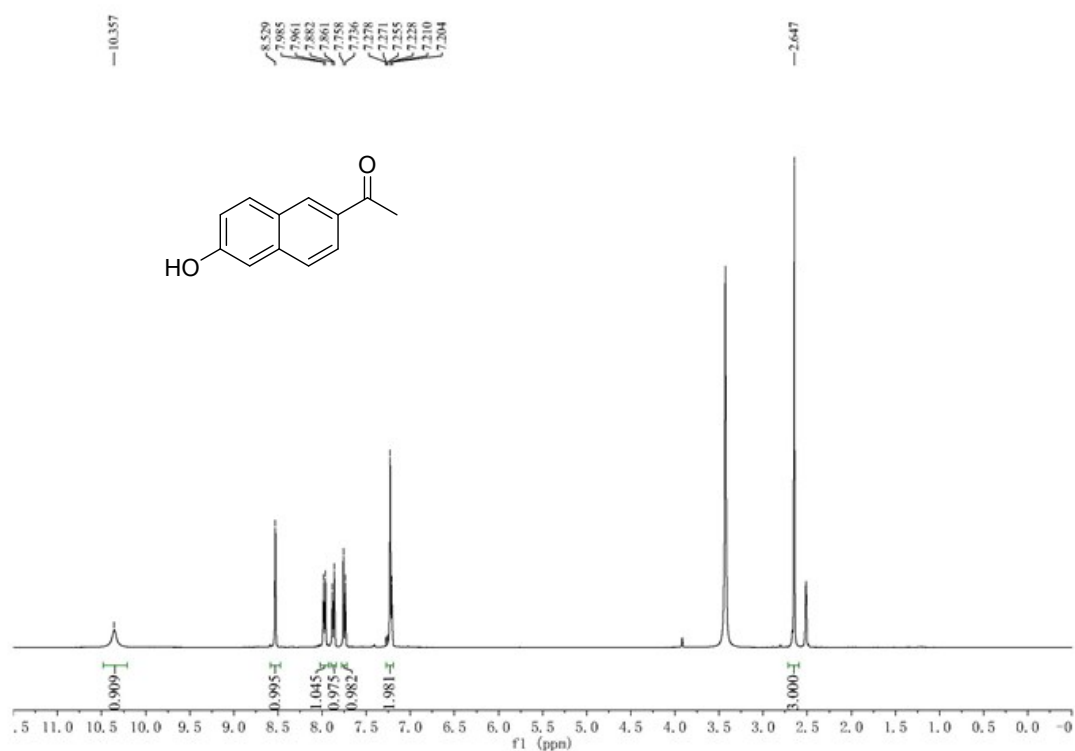

Figure S13. <sup>1</sup>H NMR spectrum of compound 3 in DMSO-*d*<sub>6</sub>



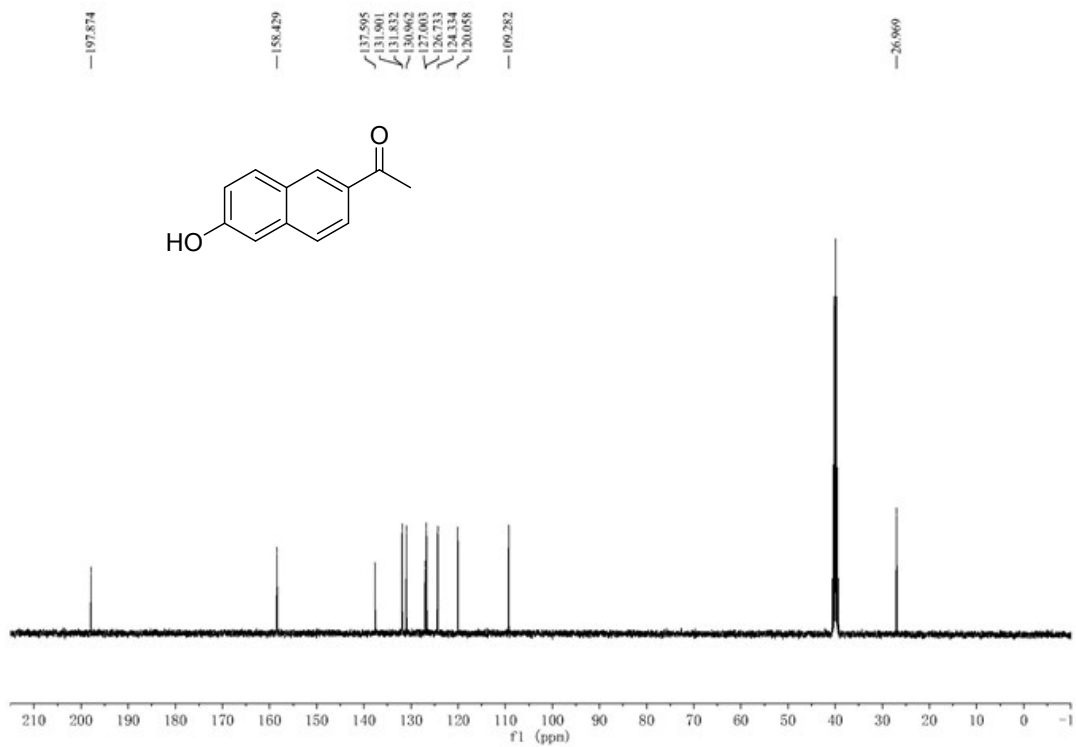

Figure S14. <sup>13</sup>C NMR spectrum of compound 3 in DMSO-*d*<sub>6</sub>

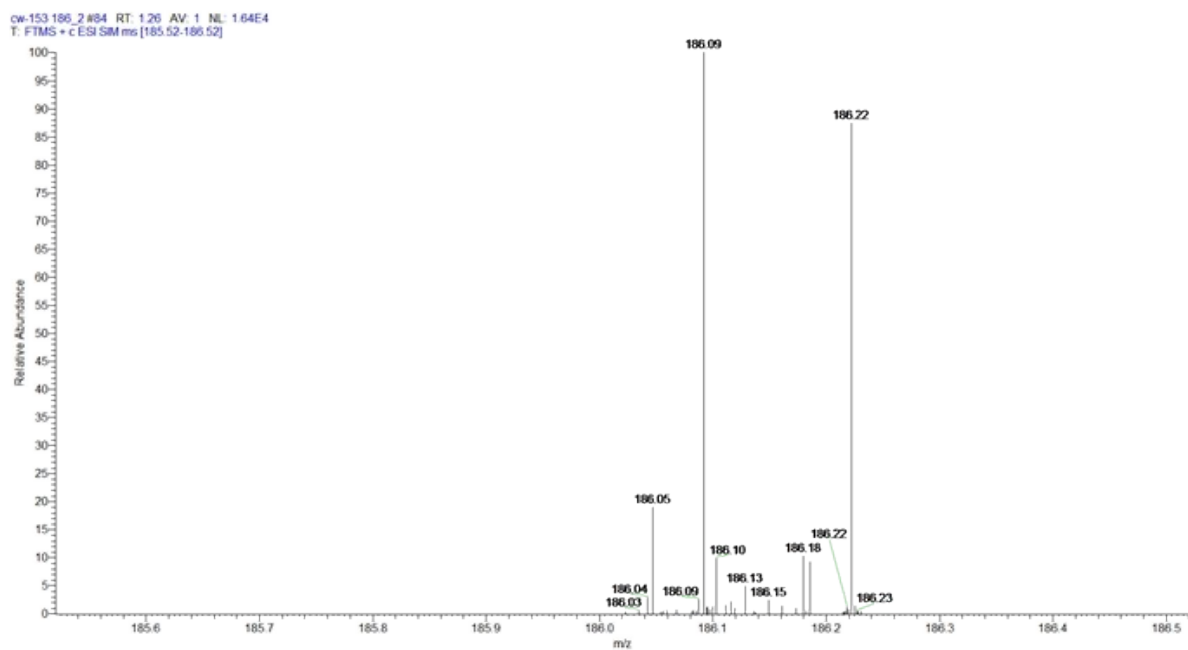

Figure S15. ESI-MS spectrum of compound 3

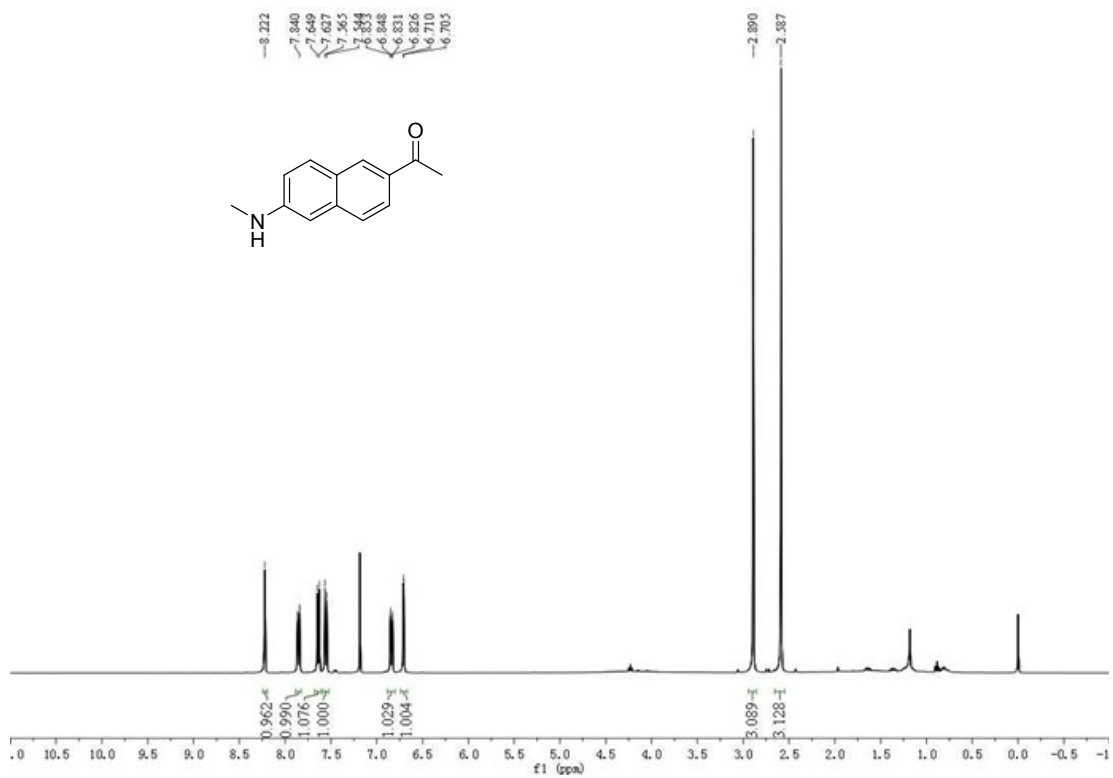

Figure S16. <sup>1</sup>H NMR spectrum of Acedan in CDCl<sub>3</sub>

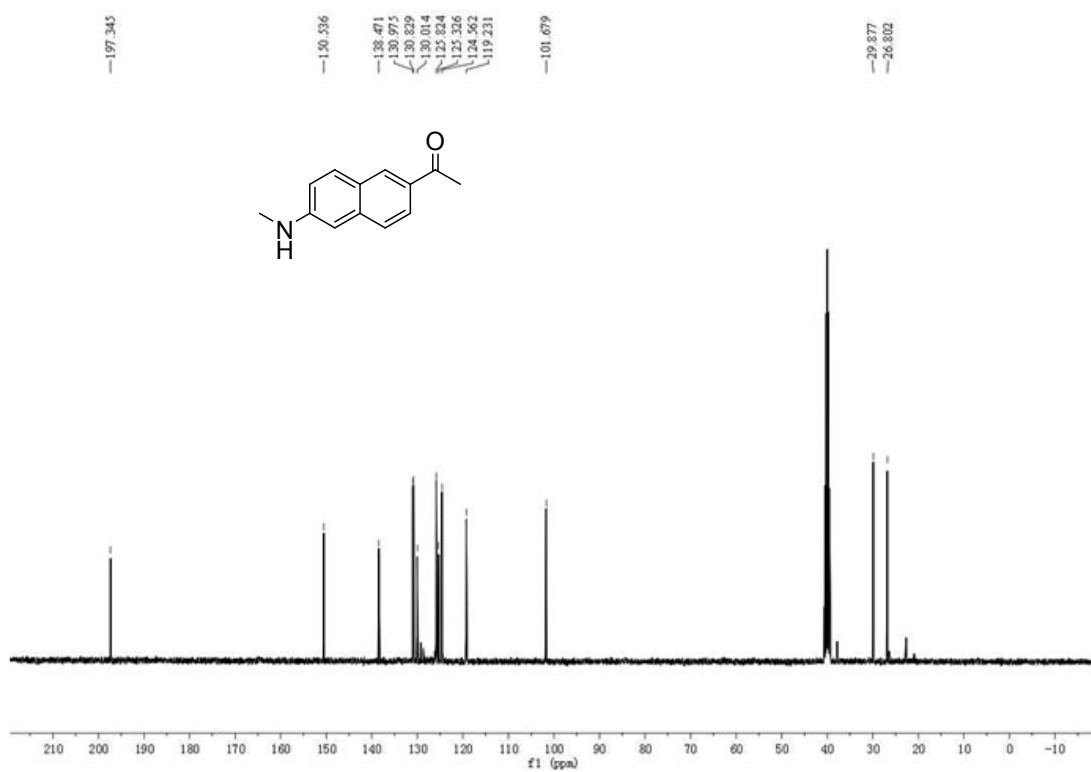

Figure S17. <sup>13</sup>C NMR spectrum of Acedan in CDCl<sub>3</sub>

lj-160613-199#11 RT: 2.01 AV: 1 SB: 3 2.69-3.03 NL: 271E6  
 T: + c EI Full ms [ 49.50-500.50]

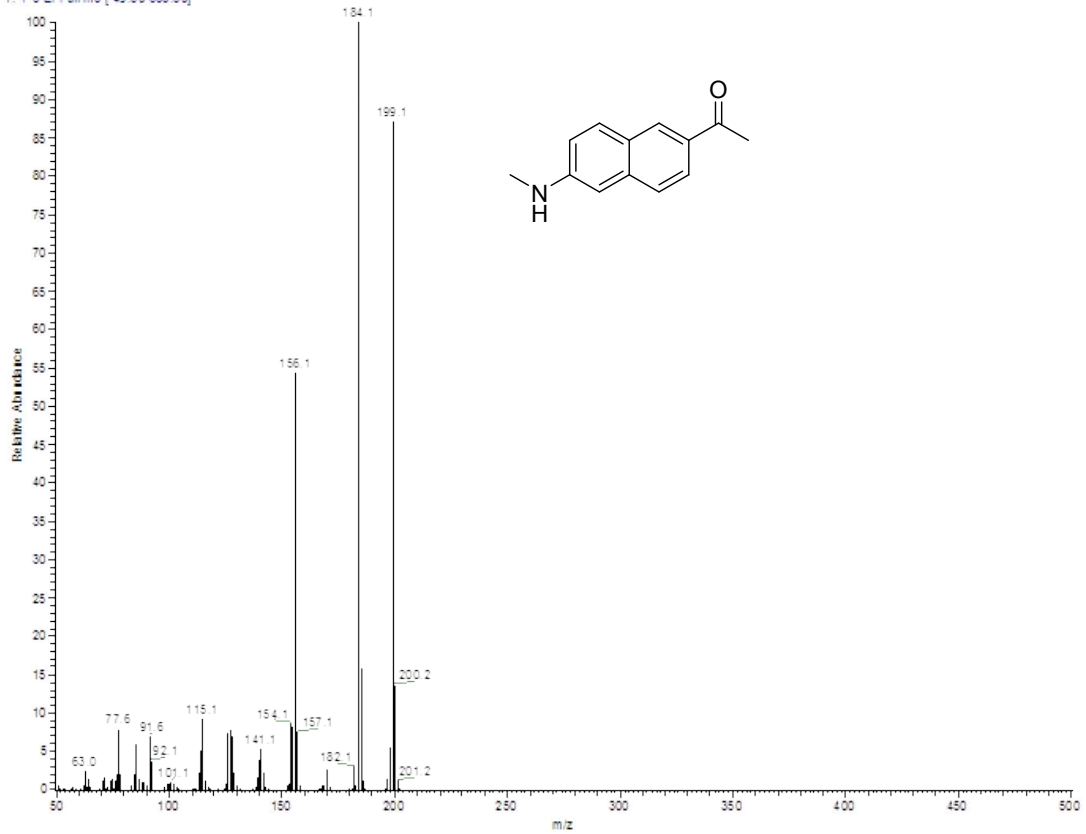

File : D:\Xcalibur\data\lxj-160615-199-hr-av2.RAW  
 Full ms [189.500 - 208.500] - Range: 189.500 - 208.500  
 Scan No. 1 of 1

| Mass     | Relative Intensity | Theoretical Mass | Delta [ppm] | Delta [mmu] | Composition                                                   |
|----------|--------------------|------------------|-------------|-------------|---------------------------------------------------------------|
| 199.0993 | 100.0              | 199.0992         | 0.7         | 0.1         | C <sub>15</sub> H <sub>13</sub> O <sub>1</sub> N <sub>1</sub> |
|          |                    | 199.1117         | -62.5       | -12.4       | C <sub>14</sub> H <sub>15</sub> O <sub>1</sub>                |
|          |                    | 199.1356         | -182.0      | -36.3       | C <sub>14</sub> H <sub>17</sub> N <sub>1</sub>                |
|          |                    | 199.0542         | 226.4       | 45.1        | C <sub>16</sub> H <sub>9</sub>                                |
|          |                    | 199.1481         | -245.2      | -48.8       | C <sub>15</sub> H <sub>13</sub>                               |

Figure S18. EI-MS spectrum of Acedan

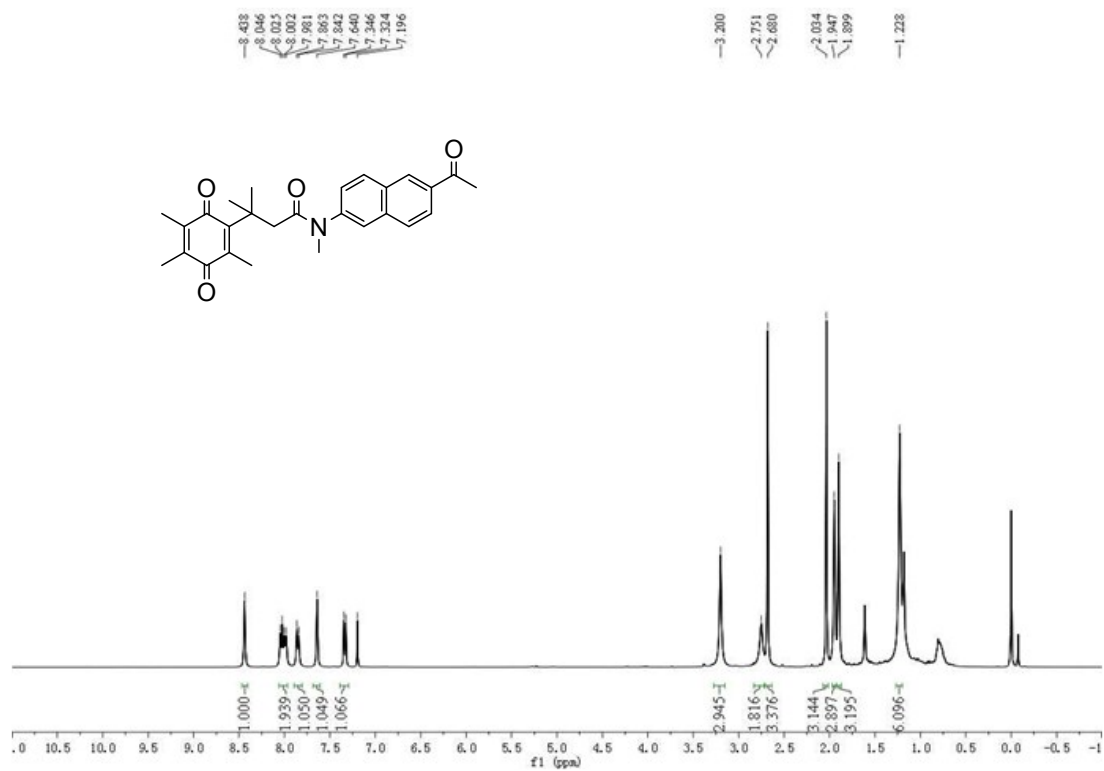

Figure S19. <sup>1</sup>H NMR spectrum of Q<sub>3</sub>CA-P in CDCl<sub>3</sub>

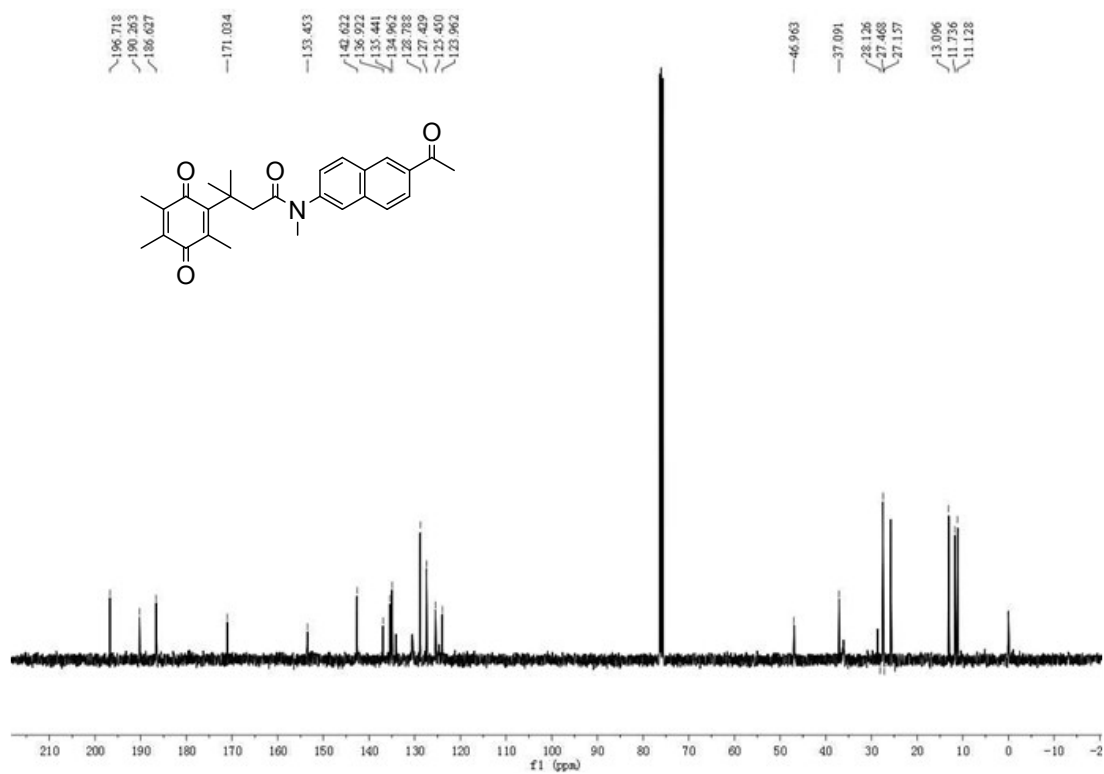

Figure S20. <sup>13</sup>C NMR spectrum of Q<sub>3</sub>CA-P in CDCl<sub>3</sub>

lxj-160614-431 #8 RT: 1.50 AV: 1 NL: 1.08E6  
T: + e EI Full ms [ 49.50-500.50]

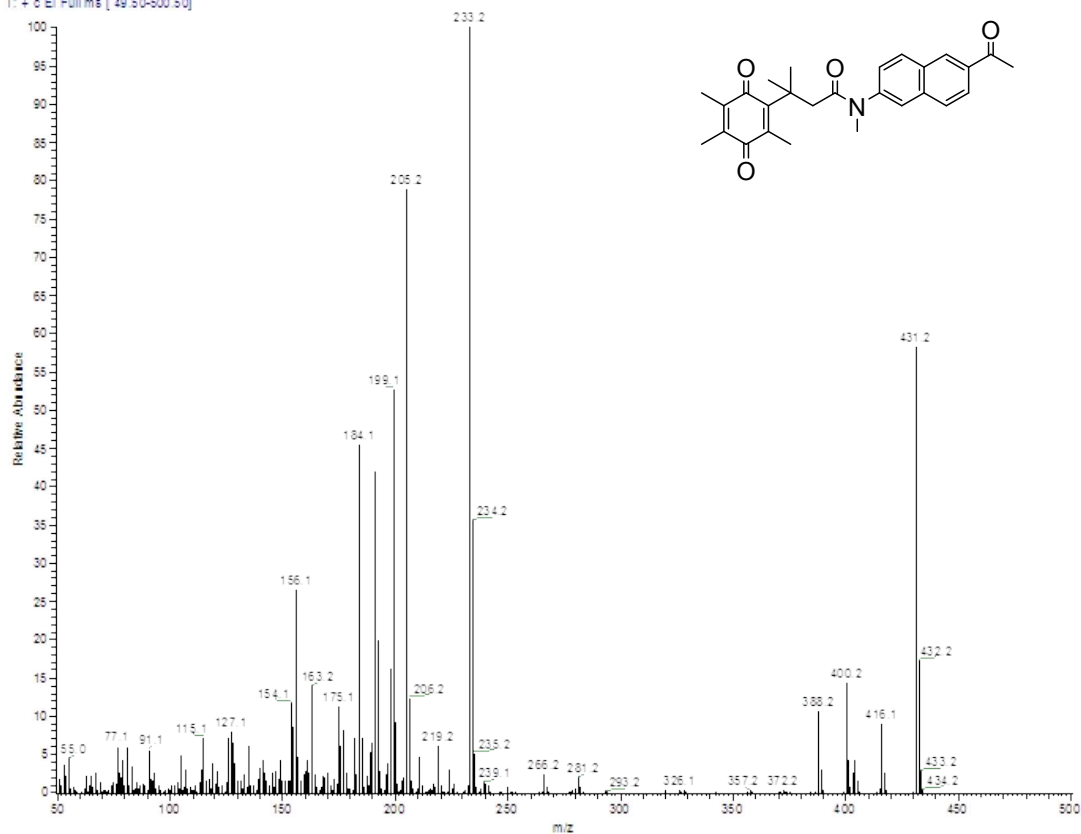

File : D:\Xcalibur\data\lxj-160615-431-hr-av2.RAW  
Full ms [427.500 - 446.500] - Range: 427.500 - 446.500  
Scan No. 1 of 1

| Mass     | Relative Intensity | Theoretical Mass | Delta [ppm] | Delta [amu] | Composition                                                   |
|----------|--------------------|------------------|-------------|-------------|---------------------------------------------------------------|
| 431.2082 | 100.0              | 431.2091         | -2.2        | -0.9        | C <sub>27</sub> H <sub>29</sub> O <sub>4</sub> N <sub>1</sub> |
|          |                    | 431.2006         | 17.7        | 7.6         | C <sub>31</sub> H <sub>27</sub> O <sub>2</sub>                |
|          |                    | 431.2217         | -31.3       | -13.5       | C <sub>28</sub> H <sub>31</sub> O <sub>6</sub>                |
|          |                    | 431.2244         | -37.6       | -16.2       | C <sub>31</sub> H <sub>29</sub> O <sub>1</sub> N <sub>1</sub> |
|          |                    | 431.1880         | 46.8        | 20.2        | C <sub>39</sub> H <sub>35</sub> O <sub>2</sub> N <sub>1</sub> |

Figure S21. EI-MS spectrum of Q<sub>3</sub>CA-P

Table S1. The comparison of Q<sub>3</sub>CA-P with other NQO1 probes

| Probe                             | Abs Max (nm) | Em Max (nm) | Stokes shift (nm) | Signal-to-Background Ratio | LOD (ng/ml) |
|-----------------------------------|--------------|-------------|-------------------|----------------------------|-------------|
| Probe 1 <sup>2</sup>              | 432          | 540         | 108               | 95:1                       | ND          |
| Q <sub>3</sub> MJSNR <sup>3</sup> | 585          | 624         | 39                | 30:1                       | ND          |
| TPQ <sup>4</sup>                  | 400          | 520         | 120               | 9:1                        | ND          |
| prodrug 1 <sup>5</sup>            | 365          | 550         | 185               | 4:1                        | ND          |
| Prodrug <sup>6</sup>              | 365          | 436         | 71                | NK                         | ND          |
| Q <sub>3</sub> CA-P               | 360          | 502         | 142               | 25:1                       | 5.6         |

LOD means limit of detection; ND, not determined; NK, not known.

## Notes and references

- 1 M. Rumi, J. Ehrlich, A. Heikal, J. Perry, S. Barlow, Z. Hu, D. McCord-Maughon, T. Parker, H. Rockel, S. Thayumanavan, S. Marder, D. Beljonne, J. Bredas, Structure-properties relationship for two-photon absorbing chromophores: disdonor diphenylpolyene and bis(styryl)benzene derivatives, *J. Am. Chem. Soc.*, 2000, **122**, 9500-9510
- 2 S. U. Hettiarachchi, B. Prasai and R. L. Mccarley, *J. Am. Chem. Soc.*, 2014, **136**, 7575-7578.
- 3 Q. A. Best, A. E. Johnson, B. Prasai, A. Rouillere and R. L. Mccarley, *Acs Chem. Biol.*, 2016, **11**, 231-240.
- 4 N. Kwon, M. K. Cho, S. J. Park, D. Kim, S. J. Nam, L. Cui, H. M. Kim and J. Yoon, *Chem. Commun.*, 2017, **53**, 525-528.
- 5 W. S. Shin, J. Han, P. Verwilst, R. Kumar, J. H. Kim and J. S. Kim, *Bioconjugate Chem.*, 2016, **27**, 1419.
- 6 P. Liu, J. Xu, D. Yan, P. Zhang, F. Zeng, B. Li and S. Wu, *Chem. Commu.*, 2015, **51**, 9567-9570.
